# Supplementary material for: FKBP5 as a Selection Biomarker for Gemcitabine and Akt Inhibitors in Treatment of Pancreatic Cancer
Source: PubMed Central journal article supplement (PMC3348935; doi:10.1371/journal.pone.0036252), 2012-05-09

Figure S1

(A)

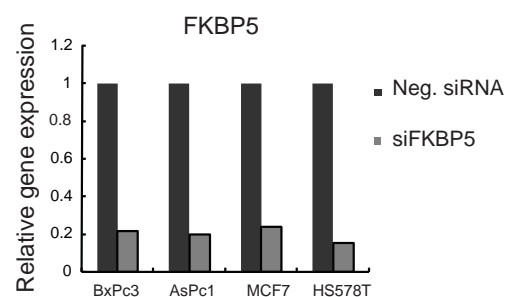

(B)

BXPC3

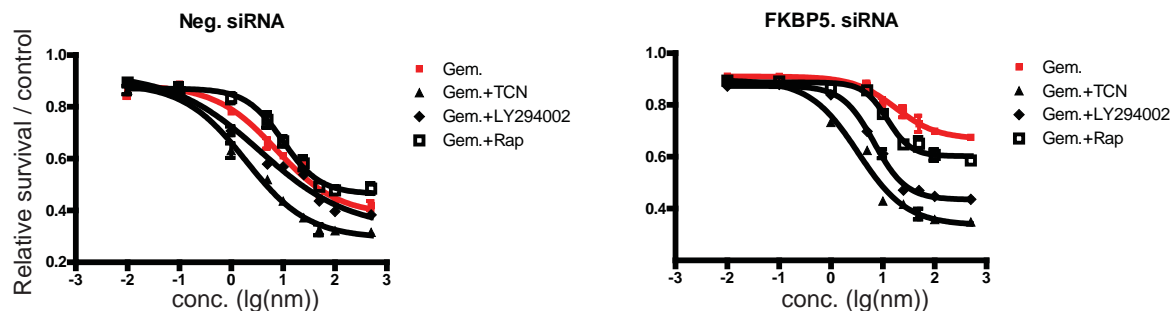

(C)

ASPC1

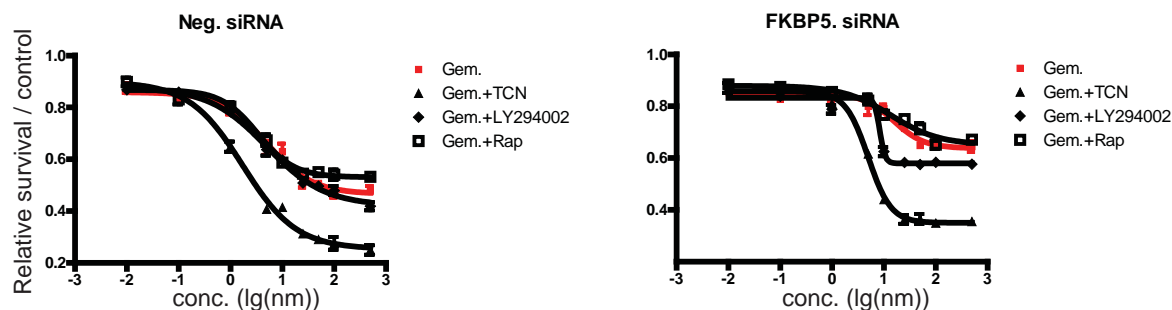

(D)

SU86

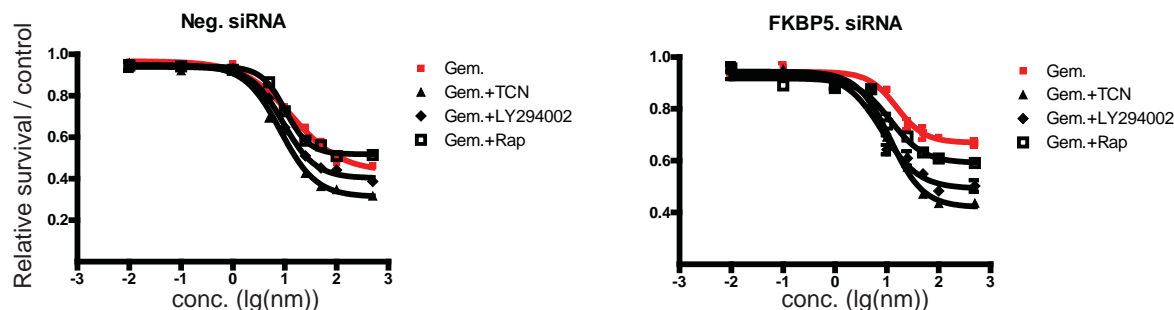

(E)

MCF7

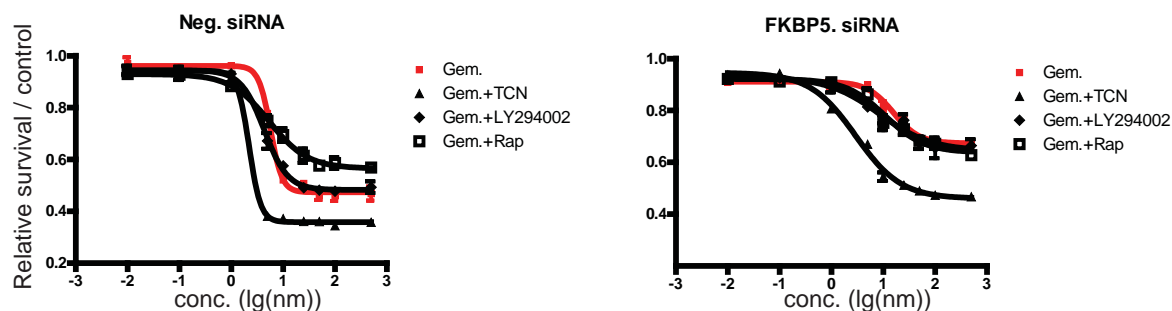

(F)

HS578T

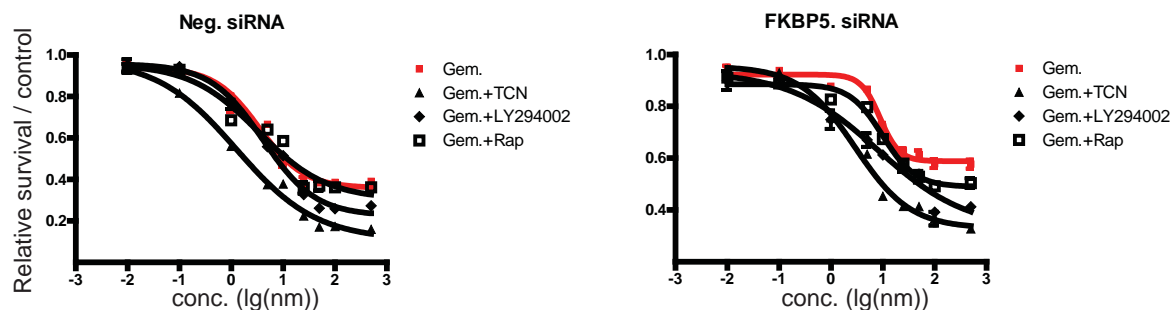

Supplement: pone.0036252.s001.pdf [file pone.0036252.s001.pdf]
