# Supplementary material for: FKBP5 as a Selection Biomarker for Gemcitabine and Akt Inhibitors in Treatment of Pancreatic Cancer
Source: PubMed Central journal article supplement (PMC3348935; doi:10.1371/journal.pone.0036252), 2012-05-09

Figure S2

(A)

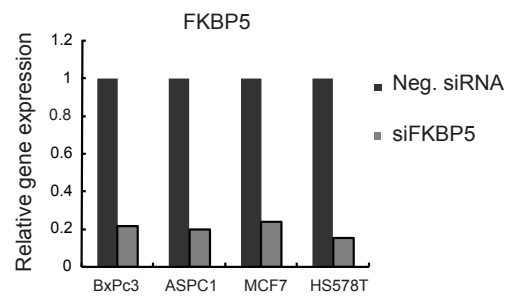

(B)

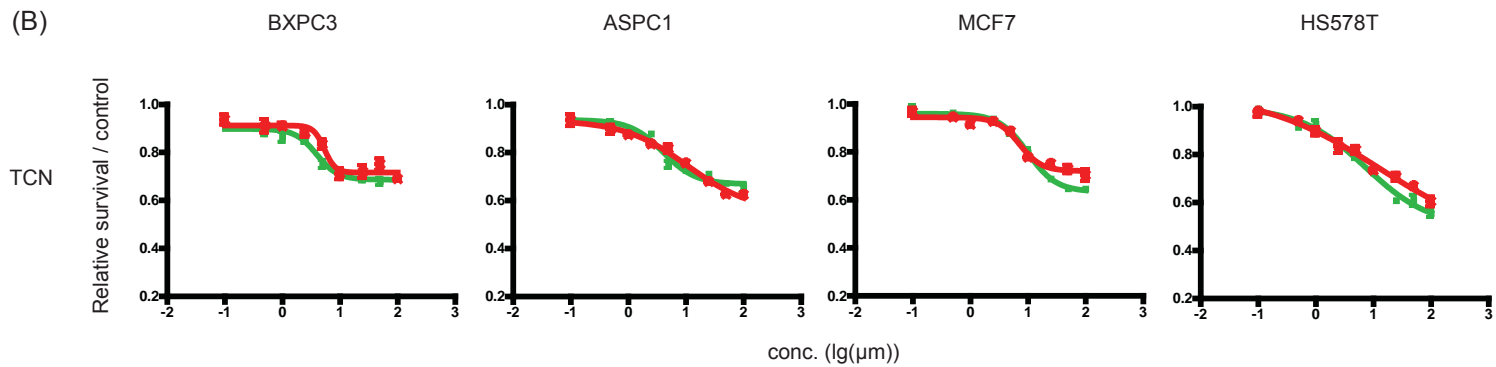

(C)

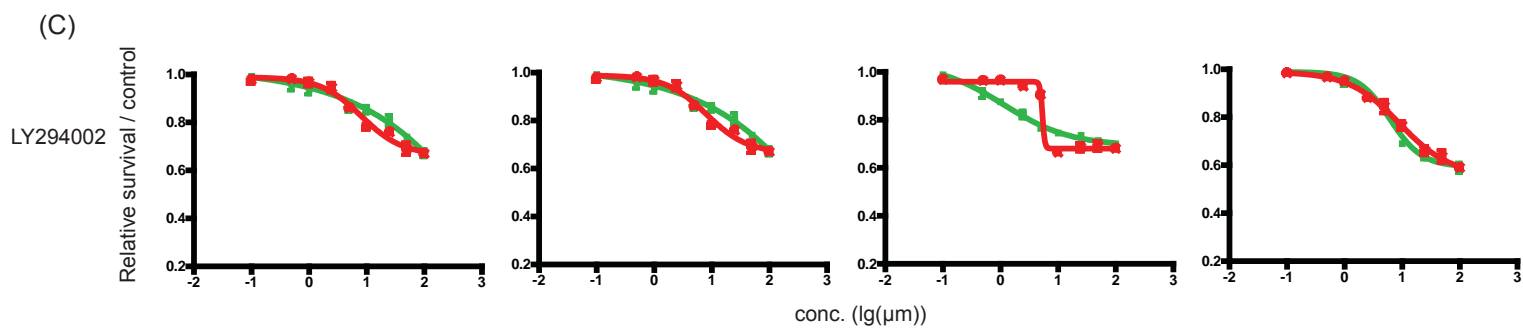

(D)

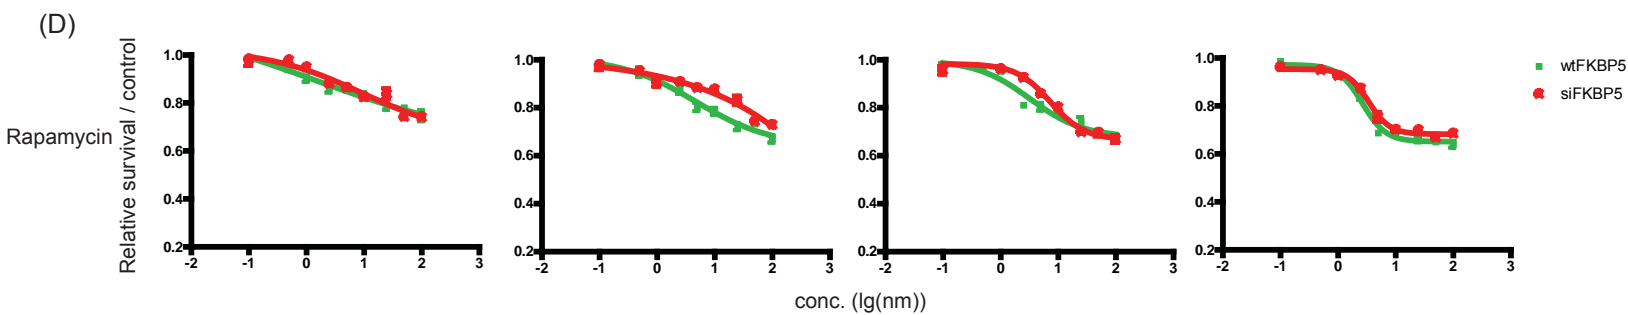

Supplement: pone.0036252.s002.pdf [file pone.0036252.s002.pdf]
